# Supplementary material
Source: PubMed Central journal article supplement (PMC3383902)
Supplement: NIHMS361433-supplement-Supp_Table_S1-S3.pdf [file NIHMS361433-supplement-Supp_Table_S1-S3.pdf]

Table S1a. NSAID study cohort overall and by quintiles of  $PS_{COH}$ , the propensity score estimated in the entire cohort.

|                                 | Overall  |          | Quintile 1 |          | Quintile 2 |          | Quintile 3 |          | Quintile 4 |          | Quintile 5 |          |
|---------------------------------|----------|----------|------------|----------|------------|----------|------------|----------|------------|----------|------------|----------|
|                                 | Coxib    | ns-NSAID | Coxib      | ns-NSAID | Coxib      | ns-NSAID | Coxib      | ns-NSAID | Coxib      | ns-NSAID | Coxib      | ns-NSAID |
| <b>N</b>                        | 32,074   | 17,637   | 4,363      | 5,579    | 5,775      | 4,167    | 6,704      | 3,239    | 7,269      | 2,673    | 7,963      | 1,979    |
| <b>Age</b>                      | 79.8±7.2 | 77.8±7.3 | 73.7±6.1   | 73.4±6.0 | 77.1±6.3   | 77.1±6.1 | 79.6±6.6   | 79.6±6.6 | 81.7±6.6   | 81.6±6.9 | 83.3±6.7   | 83.5±6.9 |
| <b>Male gender</b>              |          |          | 28.2%      | 30.4%    | 19.4%      | 18.0%    | 14.5%      | 13.5%    | 10.2%      | 11.0%    | 5.8%       | 7.6%     |
| <b>Prior hospitalization</b>    | 30.6%    | 26.1%    | 21.3%      | 20.3%    | 22.6%      | 21.8%    | 26.3%      | 24.7%    | 31.4%      | 32.8%    | 44.3%      | 44.5%    |
| <b>Nursing home residence</b>   | 8.3%     | 5.7%     | 2.4%       | 2.0%     | 4.2%       | 3.3%     | 5.8%       | 5.8%     | 8.5%       | 8.7%     | 16.5%      | 16.7%    |
| <b>Prior diagnosis of</b>       |          |          |            |          |            |          |            |          |            |          |            |          |
| Myocardial infarction           | 1.8%     | 1.6%     | 1.7%       | 1.5%     | 1.5%       | 1.3%     | 1.4%       | 1.3%     | 1.6%       | 2.1%     | 2.8%       | 2.7%     |
| Hypertension                    | 72.8%    | 70.1%    | 64.4%      | 65.4%    | 69.2%      | 68.3%    | 72.4%      | 70.5%    | 74.2%      | 75.4%    | 78.9%      | 79.5%    |
| Heart failure                   | 30.3%    | 24.6%    | 17.1%      | 15.3%    | 20.8%      | 20.1%    | 26.2%      | 25.7%    | 32.0%      | 33.4%    | 46.4%      | 46.0%    |
| Coronary disease                | 16.4%    | 14.8%    | 13.2%      | 12.7%    | 13.8%      | 12.5%    | 15.0%      | 14.4%    | 16.3%      | 17.4%    | 21.4%      | 22.5%    |
| Osteoarthritis                  | 48.5%    | 33.4%    | 8.6%       | 8.8%     | 18.9%      | 18.8%    | 41.3%      | 40.9%    | 64.5%      | 63.4%    | 83.3%      | 81.1%    |
| Rheumatoid arthritis            | 5.0%     | 2.7%     | 0.5%       | 0.3%     | 1.6%       | 0.9%     | 2.4%       | 1.7%     | 4.5%       | 4.3%     | 12.6%      | 12.5%    |
| Severe GI disorder              | 0.8%     | 0.6%     | 0.2%       | 0.3%     | 0.5%       | 0.5%     | 0.7%       | 0.9%     | 0.7%       | 0.6%     | 1.3%       | 1.0%     |
| Ulcer                           | 3.7%     | 2.4%     | 0.9%       | 0.7%     | 1.6%       | 1.1%     | 2.7%       | 2.7%     | 3.7%       | 3.5%     | 7.6%       | 8.0%     |
| Hemorrhage                      | 1.7%     | 1.1%     | 0.5%       | 0.3%     | 0.7%       | 0.7%     | 1.3%       | 1.0%     | 1.4%       | 2.0%     | 3.7%       | 3.0%     |
| <b>Prior use of</b>             |          |          |            |          |            |          |            |          |            |          |            |          |
| Corticosteroids                 | 8.7%     | 7.8%     | 7.4%       | 6.1%     | 7.1%       | 7.0%     | 7.7%       | 7.9%     | 9.0%       | 9.7%     | 11.2%      | 11.3%    |
| Warfarin                        | 13.3%    | 6.5%     | 0.6%       | 0.5%     | 1.9%       | 1.6%     | 4.5%       | 4.3%     | 10.7%      | 10.0%    | 38.2%      | 32.9%    |
| PPIs or H2-blockers             | 27.4%    | 20.4%    | 8.9%       | 7.9%     | 18.0%      | 16.5%    | 22.1%      | 21.5%    | 33.8%      | 33.3%    | 42.9%      | 44.9%    |
| <b>Charlson score</b>           | 2.0±2.0  | 1.8±2.0  | 1.6±1.9    | 1.5±1.8  | 1.7±1.9    | 1.7±1.8  | 1.9±2.0    | 1.8±1.9  | 2.0±1.9    | 2.1±2.0  | 2.6±2.1    | 2.8±2.2  |
| <b>Number of office visits</b>  | 8.6±6.7  | 7.7±6.6  | 6.7±6.0    | 6.0±5.3  | 7.3±5.7    | 7.2±5.8  | 8.1±6.2    | 8.1±7.0  | 9.0±6.6    | 9.1±6.9  | 10.6±7.6   | 11.0±8.5 |
| <b>Number of generic agents</b> | 8.4±5.2  | 7.4±5.0  | 6.1±4.0    | 5.8±3.9  | 7.0±4.4    | 6.8±4.5  | 7.8±4.8    | 7.7±4.8  | 8.8±5.1    | 8.8±5.3  | 10.8±5.9   | 11.2±6.4 |

**Table S1b. Pennsylvania APM study cohort overall and by quintiles of  $PS_{COH}$ , the propensity score estimated in the entire cohort.**

|                               | Overall      |          | Quintile 1   |          | Quintile 2   |          | Quintile 3   |          | Quintile 4   |          | Quintile 5   |          |
|-------------------------------|--------------|----------|--------------|----------|--------------|----------|--------------|----------|--------------|----------|--------------|----------|
|                               | Conventional | Atypical |
| <b>N</b>                      | 32,659       | 14,000   | 2,381        | 6,950    | 5,262        | 4,070    | 7,429        | 1,903    | 8,505        | 827      | 9,082        | 250      |
| <b>Age</b>                    | 80.5±7.3     | 83.5±7.1 | 85.3±7.0     | 84.6±6.8 | 83.2±7.0     | 83.0±7.1 | 81.4±7.0     | 82.4±7.2 | 80.0±7.0     | 80.9±7.2 | 77.4±6.4     | 79.2±6.4 |
| <b>Male gender</b>            | 16.7%        | 16.9%    | 17.0%        | 16.8%    | 16.5%        | 17.1%    | 17.2%        | 17.0%    | 16.8%        | 17.4%    | 16.4%        | 17.6%    |
| <b>White race</b>             | 94.4%        | 94.7%    | 94.2%        | 95.3%    | 94.2%        | 94.2%    | 94.2%        | 94.5%    | 94.4%        | 93.5%    | 94.7%        | 93.6%    |
| <b>Treated in</b>             |              |          |              |          |              |          |              |          |              |          |              |          |
| 1995                          | 18.2%        | 2.9%     | 1.0%         | 0.2%     | 2.8%         | 1.0%     | 5.5%         | 4.4%     | 12.8%        | 17.4%    | 47.1%        | 53.2%    |
| 1996                          | 18.4%        | 5.6%     | 3.2%         | 0.6%     | 6.0%         | 4.2%     | 10.6%        | 12.3%    | 26.0%        | 31.8%    | 28.7%        | 32.0%    |
| 1997                          | 14.5%        | 7.7%     | 5.6%         | 2.3%     | 9.5%         | 8.4%     | 14.7%        | 18.1%    | 21.9%        | 23.5%    | 12.6%        | 11.2%    |
| 1998                          | 12.2%        | 10.7%    | 11.8%        | 6.2%     | 11.2%        | 13.8%    | 18.7%        | 20.3%    | 14.6%        | 13.1%    | 5.4%         | 2.4%     |
| 1999                          | 10.1%        | 11.1%    | 10.7%        | 8.5%     | 12.8%        | 13.9%    | 16.5%        | 17.9%    | 9.8%         | 6.5%     | 3.4%         | 0.4%     |
| 2000                          | 8.3%         | 12.7%    | 13.7%        | 12.6%    | 13.6%        | 15.7%    | 13.2%        | 11.5%    | 6.5%         | 3.9%     | 1.7%         | 0.8%     |
| 2001                          | 7.2%         | 15.3%    | 16.9%        | 19.1%    | 15.5%        | 16.2%    | 9.8%         | 7.4%     | 3.8%         | 1.3%     | 0.8%         | 0.0%     |
| 2002                          | 6.0%         | 17.9%    | 19.4%        | 26.2%    | 15.5%        | 14.5%    | 6.1%         | 4.7%     | 2.6%         | 1.3%     | 0.2%         | 0.0%     |
| <b>Prior hospitalization</b>  | 47.3%        | 53.6%    | 58.5%        | 60.5%    | 45.6%        | 47.5%    | 44.4%        | 47.5%    | 45.1%        | 43.7%    | 49.7%        | 41.2%    |
| <b>Nursing home residence</b> | 12.1%        | 21.6%    | 27.7%        | 27.4%    | 16.1%        | 17.8%    | 12.9%        | 13.9%    | 9.7%         | 13.7%    | 7.4%         | 8.0%     |
| <b>Prior diagnosis of</b>     |              |          |              |          |              |          |              |          |              |          |              |          |
| Myocardial infarction         | 1.9%         | 1.4%     | 1.3%         | 1.2%     | 1.5%         | 1.4%     | 1.7%         | 1.5%     | 2.0%         | 2.7%     | 2.5%         | 2.4%     |
| Hypertension                  | 1.9%         | 1.4%     | 1.3%         | 1.2%     | 1.5%         | 1.4%     | 1.7%         | 1.5%     | 2.0%         | 2.7%     | 2.5%         | 2.4%     |
| Heart failure                 | 1.9%         | 1.4%     | 1.3%         | 1.2%     | 1.5%         | 1.4%     | 1.7%         | 1.5%     | 2.0%         | 2.7%     | 2.5%         | 2.4%     |
| Cerebrovascular disease       | 1.9%         | 1.4%     | 1.3%         | 1.2%     | 1.5%         | 1.4%     | 1.7%         | 1.5%     | 2.0%         | 2.7%     | 2.5%         | 2.4%     |
| Other cardiovascular disease  | 53.9%        | 59.0%    | 62.9%        | 62.1%    | 56.2%        | 56.0%    | 53.3%        | 55.8%    | 52.3%        | 56.2%    | 52.3%        | 53.2%    |
| Arrythmia                     | 1.9%         | 1.4%     | 1.3%         | 1.2%     | 1.5%         | 1.4%     | 1.7%         | 1.5%     | 2.0%         | 2.7%     | 2.5%         | 2.4%     |
| Other dysrhythmias            | 53.9%        | 59.0%    | 62.9%        | 62.1%    | 56.2%        | 56.0%    | 53.3%        | 55.8%    | 52.3%        | 56.2%    | 52.3%        | 53.2%    |
| HIV                           | 53.9%        | 59.0%    | 62.9%        | 62.1%    | 56.2%        | 56.0%    | 53.3%        | 55.8%    | 52.3%        | 56.2%    | 52.3%        | 53.2%    |
| Diabetes                      | 28.3%        | 26.7%    | 24.9%        | 26.5%    | 28.2%        | 25.6%    | 27.6%        | 28.2%    | 28.5%        | 29.6%    | 29.6%        | 30.4%    |
| Dementia                      | 53.9%        | 59.0%    | 62.9%        | 62.1%    | 56.2%        | 56.0%    | 53.3%        | 55.8%    | 52.3%        | 56.2%    | 52.3%        | 53.2%    |

|                                 |         |         |         |         |         |         |         |         |         |         |         |         |
|---------------------------------|---------|---------|---------|---------|---------|---------|---------|---------|---------|---------|---------|---------|
| Delirium                        | 53.9%   | 59.0%   | 62.9%   | 62.1%   | 56.2%   | 56.0%   | 53.3%   | 55.8%   | 52.3%   | 56.2%   | 52.3%   | 53.2%   |
| Mood disorders                  | 13.4%   | 36.3%   | 50.5%   | 51.5%   | 23.9%   | 25.1%   | 13.5%   | 17.0%   | 7.8%    | 16.4%   | 2.7%    | 9.6%    |
| Psychotic disorders             | 13.4%   | 36.3%   | 50.5%   | 51.5%   | 23.9%   | 25.1%   | 13.5%   | 17.0%   | 7.8%    | 16.4%   | 2.7%    | 9.6%    |
| <b>Prior use of</b>             |         |         |         |         |         |         |         |         |         |         |         |         |
| Anti-depressants                | 22.1%   | 43.4%   | 59.7%   | 54.7%   | 34.6%   | 36.6%   | 23.1%   | 28.5%   | 16.8%   | 24.2%   | 9.3%    | 15.6%   |
| <b>Charlson score</b>           | 3.1±3.1 | 2.4±2.2 | 2.3±2.0 | 2.3±2.0 | 2.1±2.1 | 2.3±2.2 | 2.4±2.5 | 2.5±2.4 | 3.0±3.1 | 2.8±2.9 | 4.4±3.8 | 3.4±3.3 |
| <b>Number of office visits</b>  | 5.4±4.9 | 3.9±3.8 | 3.3±3.2 | 3.5±3.2 | 3.8±3.5 | 3.8±3.9 | 4.6±3.9 | 4.5±4.2 | 5.4±4.6 | 5.3±5.0 | 7.6±5.9 | 6.2±5.5 |
| <b>Number of generic agents</b> | 8.4±5.0 | 7.9±4.9 | 8.2±4.8 | 7.7±4.6 | 7.9±4.8 | 7.9±4.9 | 8.1±4.9 | 8.5±5.4 | 8.2±4.9 | 8.4±5.6 | 9.1±5.3 | 8.6±5.4 |

---

**Table S1c. British Columbia APM study cohort overall and by quintiles of  $PS_{COH}$ , the propensity score estimated in the entire cohort.**

|                               | Overall      |          | Quintile 1   |          | Quintile 2   |          | Quintile 3   |          | Quintile 4   |          | Quintile 5   |          |
|-------------------------------|--------------|----------|--------------|----------|--------------|----------|--------------|----------|--------------|----------|--------------|----------|
|                               | Conventional | Atypical |
| <b>N</b>                      | 16,311       | 26,254   | 1,057        | 7,456    | 1,624        | 6,889    | 2,689        | 5,824    | 4,381        | 4,132    | 6,560        | 1,953    |
| <b>Age</b>                    | 79.2±8.6     | 80.3±8.3 | 83.7±8.3     | 82.6±8.2 | 80.8±8.7     | 80.5±8.2 | 77.8±8.4     | 78.4±8.1 | 78.6±8.6     | 79.0±8.2 | 79.0±8.5     | 79.0±8.1 |
| <b>Male gender</b>            | 43.6%        | 36.9%    | 27.7%        | 27.4%    | 36.8%        | 36.6%    | 41.9%        | 42.9%    | 42.7%        | 41.9%    | 49.1%        | 45.5%    |
| <b>Treated in</b>             |              |          |              |          |              |          |              |          |              |          |              |          |
| 1997                          | 19.2%        | 2.9%     | 0.0%         | 0.0%     | 0.0%         | 0.0%     | 0.0%         | 0.0%     | 3.0%         | 2.4%     | 45.8%        | 33.7%    |
| 1998                          | 17.9%        | 5.6%     | 0.0%         | 0.0%     | 0.1%         | 0.0%     | 1.8%         | 1.1%     | 17.5%        | 15.5%    | 32.1%        | 39.2%    |
| 1999                          | 16.3%        | 8.1%     | 0.0%         | 0.0%     | 0.7%         | 0.6%     | 8.1%         | 6.7%     | 31.8%        | 31.3%    | 15.8%        | 20.2%    |
| 2000                          | 12.0%        | 12.1%    | 3.3%         | 1.7%     | 10.2%        | 8.0%     | 24.3%        | 23.3%    | 21.5%        | 26.5%    | 2.4%         | 2.4%     |
| 2001                          | 10.2%        | 15.3%    | 13.8%        | 9.1%     | 23.0%        | 20.1%    | 21.8%        | 25.8%    | 9.9%         | 10.4%    | 1.7%         | 1.9%     |
| 2002                          | 9.1%         | 16.6%    | 21.8%        | 17.7%    | 22.7%        | 23.3%    | 17.2%        | 19.1%    | 7.5%         | 6.8%     | 1.4%         | 1.8%     |
| 2003                          | 7.8%         | 19.1%    | 28.7%        | 32.5%    | 21.5%        | 24.2%    | 14.4%        | 12.4%    | 4.8%         | 4.3%     | 0.4%         | 0.7%     |
| <b>Prior hospitalization</b>  | 20.2%        | 14.7%    | 11.3%        | 9.2%     | 12.6%        | 11.7%    | 16.9%        | 17.2%    | 22.9%        | 22.2%    | 23.1%        | 23.3%    |
| <b>Nursing home residence</b> | 26.1%        | 25.9%    | 31.5%        | 28.1%    | 26.7%        | 25.1%    | 21.5%        | 22.9%    | 24.8%        | 26.9%    | 27.8%        | 27.1%    |
| <b>Prior diagnosis of</b>     |              |          |              |          |              |          |              |          |              |          |              |          |
| Myocardial infarction         | 2.6%         | 2.3%     | 2.6%         | 1.3%     | 2.8%         | 2.0%     | 3.2%         | 2.9%     | 2.9%         | 3.7%     | 2.2%         | 2.7%     |
| Hypertension                  | 22.3%        | 24.1%    | 26.8%        | 25.3%    | 25.2%        | 24.2%    | 24.8%        | 24.7%    | 21.1%        | 22.8%    | 20.7%        | 20.6%    |
| Heart failure                 | 8.0%         | 6.3%     | 6.3%         | 4.3%     | 6.2%         | 5.0%     | 7.4%         | 7.7%     | 7.8%         | 9.3%     | 9.0%         | 8.0%     |
| Cerebrovascular disease       | 10.2%        | 10.0%    | 11.7%        | 9.2%     | 10.5%        | 9.9%     | 10.2%        | 10.4%    | 10.1%        | 10.4%    | 10.0%        | 11.2%    |
| Ischemic heart disease        | 3.6%         | 2.8%     | 1.4%         | 1.4%     | 2.8%         | 2.2%     | 4.4%         | 3.5%     | 4.1%         | 5.3%     | 3.6%         | 3.0%     |
| Arrythmia                     | 0.0%         | 0.1%     | 0.1%         | 0.2%     | 0.0%         | 0.1%     | 0.0%         | 0.0%     | 0.1%         | 0.0%     | 0.0%         | 0.0%     |
| <b>Other dysrhythmias</b>     |              |          |              |          |              |          |              |          |              |          |              |          |
| Diabetes                      | 14.9%        | 13.8%    | 10.8%        | 11.8%    | 15.2%        | 12.7%    | 16.1%        | 15.6%    | 15.3%        | 15.9%    | 14.6%        | 15.1%    |
| Dementia                      | 8.4%         | 12.4%    | 22.2%        | 18.9%    | 11.4%        | 12.3%    | 7.4%         | 8.7%     | 8.6%         | 9.0%     | 5.8%         | 6.2%     |
| Delirium                      | 7.4%         | 8.9%     | 12.3%        | 11.6%    | 8.7%         | 7.5%     | 8.4%         | 8.3%     | 7.1%         | 8.2%     | 5.9%         | 6.8%     |
| Mood disorders                | 14.9%        | 25.2%    | 41.3%        | 46.2%    | 21.1%        | 19.3%    | 16.0%        | 15.9%    | 15.7%        | 16.8%    | 8.0%         | 11.3%    |
| Other psychotic disorders     | 3.0%         | 4.5%     | 7.9%         | 7.4%     | 3.9%         | 3.5%     | 3.1%         | 3.5%     | 3.1%         | 3.2%     | 1.8%         | 3.0%     |

|                                 |         |         |         |         |         |         |         |         |         |         |         |         |
|---------------------------------|---------|---------|---------|---------|---------|---------|---------|---------|---------|---------|---------|---------|
| <b>Prior use of</b>             |         |         |         |         |         |         |         |         |         |         |         |         |
| Anti-depressants                | 26.6%   | 41.3%   | 63.2%   | 66.5%   | 39.9%   | 38.1%   | 28.9%   | 28.7%   | 27.5%   | 29.3%   | 15.9%   | 20.1%   |
| Psychotic medications           | 10.4%   | 16.9%   | 31.9%   | 27.6%   | 15.0%   | 14.5%   | 11.4%   | 12.6%   | 10.1%   | 11.1%   | 5.6%    | 9.2%    |
| Other psychiatric medications   | 4.0%    | 3.6%    | 3.9%    | 3.5%    | 3.7%    | 3.3%    | 3.7%    | 3.7%    | 3.9%    | 3.8%    | 4.2%    | 4.8%    |
| <b>Charlson score</b>           | 1.1±1.4 | 0.8±1.2 | 0.6±0.8 | 0.5±0.8 | 0.7±1.0 | 0.7±1.0 | 1.0±1.2 | 1.0±1.2 | 1.2±1.6 | 1.1±1.5 | 1.2±1.5 | 1.1±1.6 |
| <b>Number of generic agents</b> | 7.9±5.3 | 7.5±5.1 | 7.0±4.7 | 7.1±4.6 | 7.6±5.1 | 7.2±4.9 | 7.7±5.1 | 7.8±5.3 | 8.0±5.4 | 8.1±5.6 | 8.1±5.4 | 8.0±5.7 |

Table S2a. Empirical results for the NSAID study. Key within-PS interactions were omitted from PS models.

| Model                                                                      |                                   | Entire Cohort<br>(n=49,711) | Males<br>(n=7,854)    | Females<br>(n=41,857) | Age <75<br>(n=14,103) | Age ≥75<br>(n=35,608) | High Risk<br>(n=12,627) <sup>a</sup> |
|----------------------------------------------------------------------------|-----------------------------------|-----------------------------|-----------------------|-----------------------|-----------------------|-----------------------|--------------------------------------|
| Exposed outcomes                                                           | N                                 | 503                         | 71                    | 432                   | 83                    | 420                   | 348                                  |
| Unexposed outcomes                                                         | N                                 | 243                         | 57                    | 186                   | 49                    | 194                   | 157                                  |
| <b>Unadjusted</b>                                                          | OR [CI]                           | 1.14 [0.98, 1.33]           | 0.92 [0.65, 1.30]     | 1.21 [1.02, 1.44]     | 1.30 [0.91, 1.86]     | 1.04 [0.87, 1.23]     | 0.91 [0.75, 1.10]                    |
| <b>Age/sex adjusted</b>                                                    | OR [CI]                           | 1.08 [0.92, 1.26]           | 0.87 [0.61, 1.24]     | 1.14 [0.95, 1.35]     | 1.32 [0.93, 1.89]     | 1.02 [0.86, 1.21]     | 0.88 [0.73, 1.07]                    |
| <b>Adjusted by all covariates</b>                                          | OR [CI]                           | 0.87 [0.71, 1.08]           | 0.68 [0.42, 1.12]     | 0.93 [0.73, 1.17]     | 1.07 [0.67, 1.72]     | 0.83 [0.65, 1.05]     | 0.74 [0.53, 1.04]                    |
| <b>PS estimated within subgroup (PS<sub>SS</sub>)</b>                      |                                   |                             |                       |                       |                       |                       |                                      |
| <b>"Referent Standard"</b>                                                 |                                   |                             |                       |                       |                       |                       |                                      |
| Adj. by deciles of PS <sub>SS</sub>                                        | OR [CI]                           | 0.94 [0.80, 1.10]           | 0.81 [0.56, 1.16]     | 0.97 [0.81, 1.16]     | 1.04 [0.72, 1.50]     | 0.91 [0.76, 1.09]     | 0.92 [0.75, 1.12]                    |
|                                                                            | Distance <sup>b</sup>             | 0.028                       | 0.106                 | 0.031                 | 0.067                 | 0.040                 | 0.082                                |
| Matched on PS <sub>SS</sub>                                                | N Matched                         | 33,264                      | 5,840                 | 27,416                | 10,816                | 22,352                | 7,226                                |
|                                                                            | OR [CI]                           | 0.91 [0.76, 1.10]           | 0.92 [0.61, 1.38]     | 1.04 [0.85, 1.27]     | 0.93 [0.61, 1.43]     | 0.81 [0.66, 1.01]     | 0.88 [0.70, 1.11]                    |
|                                                                            | Distance                          | 0.001                       | 0.004                 | 0.001                 | 0.002                 | 0.001                 | 0.002                                |
| <b>PS estimated overall (PS<sub>COH</sub>) and applied within subgroup</b> |                                   |                             |                       |                       |                       |                       |                                      |
| Adj. by deciles of PS <sub>COH</sub>                                       | OR [CI]                           | 0.94 [0.80, 1.10]           | 0.75 [0.52, 1.09]     | 0.98 [0.82, 1.17]     | 1.19 [0.82, 1.72]     | 0.89 [0.74, 1.06]     | 0.89 [0.73, 1.08]                    |
|                                                                            | <b>Difference (%)<sup>c</sup></b> | <b>0.00 (0.0%)</b>          | <b>-0.05 (-6.6%)</b>  | <b>0.01 (1.3%)</b>    | <b>0.15 (14.3%)</b>   | <b>-0.02 (-2.3%)</b>  | <b>-0.03 (-2.8%)</b>                 |
|                                                                            | Distance                          | 0.028                       | 0.109                 | 0.031                 | 0.062                 | 0.038                 | 0.091                                |
| Matched on PS <sub>COH</sub>                                               | N Matched                         | 33,264                      | 5,840                 | 27,434                | 10,874                | 22,366                | 7,242                                |
|                                                                            | OR [CI]                           | 0.91 [0.76, 1.10]           | 0.81 [0.54, 1.21]     | 0.99 [0.81, 1.22]     | 1.16 [0.78, 1.73]     | 0.92 [0.75, 1.13]     | 0.81 [0.63, 1.02]                    |
|                                                                            | <b>Difference (%)</b>             | <b>0.00 (0.0%)</b>          | <b>-0.11 (-11.5%)</b> | <b>-0.04 (-4.3%)</b>  | <b>0.23 (24.3%)</b>   | <b>0.11 (13.0%)</b>   | <b>-0.07 (-8.5%)</b>                 |
|                                                                            | Distance                          | 0.001                       | 0.009                 | 0.002                 | 0.009                 | 0.001                 | 0.009                                |
| <b>Matched pairs from PS<sub>COH</sub> matches</b>                         |                                   |                             |                       |                       |                       |                       |                                      |
| Matched on PS <sub>COH</sub>                                               | N Matched                         | 33,264                      | 1,402                 | 22,876                | 4,886                 | 16,446                | 2,166                                |
|                                                                            | OR [CI]                           | 0.92 [0.77, 1.11]           | 0.53 [0.21, 1.35]     | 0.99 [0.80, 1.24]     | 1.30 [0.69, 2.45]     | 0.99 [0.78, 1.26]     | 0.71 [0.46, 1.08]                    |
|                                                                            | <b>Difference (%)</b>             | <b>0.01 (0.9%)</b>          | <b>-0.38 (-41.8%)</b> | <b>-0.04 (-4.3%)</b>  | <b>0.37 (39.3%)</b>   | <b>0.18 (22.0%)</b>   | <b>-0.17 (-19.7%)</b>                |
|                                                                            | Distance                          | 0.001                       | 0.046                 | 0.002                 | 0.028                 | 0.001                 | 0.016                                |

- <sup>a</sup> Patients with prior gastrointestinal-related diagnoses or hospitalizations.
- <sup>b</sup> Mahalanobis distance between patients in the exposure and referent categories. In the decile analyses, the distance is measured within each decile and then averaged.
- <sup>c</sup> Difference between the observed odds ratio after adjusting by or matching on  $PS_{COH}$  versus  $PS_{SS}$ .

**Table S2b. Empirical results for the Pennsylvania APM study. Key within-PS interactions were omitted from PS models.**

| Model                                                                      |                                   | Entire Cohort<br>(n=46,659) | Males<br>(n=7,841)    | Females<br>(n=38,818) | Age <75<br>(n=10,035) | Age ≥75<br>(n=36,624) | High Risk<br>(n=29,994) <sup>a</sup> |
|----------------------------------------------------------------------------|-----------------------------------|-----------------------------|-----------------------|-----------------------|-----------------------|-----------------------|--------------------------------------|
| Exposed outcomes                                                           | N                                 | 6214                        | 1546                  | 4668                  | 1213                  | 5001                  | 4454                                 |
| Unexposed outcomes                                                         | N                                 | 2061                        | 510                   | 1551                  | 127                   | 1934                  | 1667                                 |
| <b>Unadjusted</b>                                                          | OR [CI]                           | 1.36 [1.29, 1.44]           | 1.44 [1.28, 1.61]     | 1.35 [1.27, 1.43]     | 2.26 [1.87, 2.74]     | 1.37 [1.29, 1.45]     | 1.37 [1.29, 1.46]                    |
| <b>Age/sex adjusted</b>                                                    | OR [CI]                           | 1.58 [1.50, 1.67]           | 1.62 [1.44, 1.83]     | 1.57 [1.47, 1.67]     | 2.36 [1.95, 2.86]     | 1.51 [1.43, 1.61]     | 1.56 [1.46, 1.66]                    |
| <b>Adjusted by all covariates</b>                                          | OR [CI]                           | 1.25 [1.16, 1.33]           | 1.21 [1.05, 1.40]     | 1.25 [1.16, 1.35]     | 1.29 [1.02, 1.63]     | 1.26 [1.17, 1.36]     | 1.27 [1.18, 1.38]                    |
| <b>PS estimated within subgroup (PS<sub>SS</sub>)</b>                      |                                   |                             |                       |                       |                       |                       |                                      |
| <i>"Referent Standard"</i>                                                 |                                   |                             |                       |                       |                       |                       |                                      |
| Adj. by deciles of PS <sub>SS</sub>                                        | OR [CI]                           | 1.25 [1.17, 1.34]           | 1.20 [1.04, 1.38]     | 1.27 [1.18, 1.37]     | 1.19 [0.95, 1.50]     | 1.27 [1.18, 1.36]     | 1.28 [1.19, 1.39]                    |
|                                                                            | Distance <sup>b</sup>             | 0.356                       | 0.834                 | 0.361                 | 2.326                 | 0.323                 | 0.435                                |
| Matched on PS <sub>SS</sub>                                                | N Matched                         | 18,584                      | 3,166                 | 15,376                | 2,684                 | 15,832                | 12,690                               |
|                                                                            | OR [CI]                           | 1.24 [1.14, 1.34]           | 1.19 [1.00, 1.40]     | 1.30 [1.19, 1.42]     | 0.99 [0.75, 1.31]     | 1.23 [1.13, 1.34]     | 1.33 [1.22, 1.46]                    |
|                                                                            | Distance                          | 0.005                       | 0.012                 | 0.005                 | 0.022                 | 0.002                 | 0.004                                |
| <b>PS estimated overall (PS<sub>COH</sub>) and applied within subgroup</b> |                                   |                             |                       |                       |                       |                       |                                      |
| Adj. by deciles of PS <sub>COH</sub>                                       | OR [CI]                           | 1.25 [1.17, 1.34]           | 1.19 [1.04, 1.37]     | 1.27 [1.18, 1.38]     | 1.34 [1.07, 1.69]     | 1.26 [1.17, 1.35]     | 1.27 [1.18, 1.38]                    |
|                                                                            | <b>Difference (%)<sup>c</sup></b> | <b>0.00 (0.0%)</b>          | <b>-0.01 (-0.5%)</b>  | <b>0.00 (0.1%)</b>    | <b>0.15 (12.8%)</b>   | <b>-0.01 (-0.5%)</b>  | <b>-0.01 (-0.8%)</b>                 |
|                                                                            | Distance                          | 0.356                       | 1.033                 | 0.352                 | 2.033                 | 0.335                 | 0.442                                |
| Matched on PS <sub>COH</sub>                                               | N Matched                         | 18,584                      | 3,192                 | 15,412                | 2,696                 | 15,890                | 12,718                               |
|                                                                            | OR [CI]                           | 1.24 [1.14, 1.34]           | 1.20 [1.02, 1.42]     | 1.28 [1.17, 1.40]     | 1.18 [0.90, 1.56]     | 1.25 [1.15, 1.35]     | 1.26 [1.15, 1.38]                    |
|                                                                            | <b>Difference (%)</b>             | <b>0.00 (0.0%)</b>          | <b>0.02 (1.4%)</b>    | <b>-0.02 (-1.5%)</b>  | <b>0.19 (19.5%)</b>   | <b>0.01 (1.1%)</b>    | <b>-0.08 (-5.7%)</b>                 |
|                                                                            | Distance                          | 0.005                       | 0.063                 | 0.008                 | 0.086                 | 0.010                 | 0.018                                |
| <b>Matched pairs from PS<sub>COH</sub> matches</b>                         |                                   |                             |                       |                       |                       |                       |                                      |
| Matched on PS <sub>COH</sub>                                               | N Matched                         | 18,584                      | 564                   | 12,916                | 482                   | 13,564                | 8,336                                |
|                                                                            | OR [CI]                           | 1.24 [1.14, 1.34]           | 0.98 [0.66, 1.45]     | 1.33 [1.20, 1.46]     | 1.55 [0.86, 2.78]     | 1.24 [1.13, 1.36]     | 1.30 [1.17, 1.45]                    |
|                                                                            | <b>Difference (%)</b>             | <b>0.00 (0.0%)</b>          | <b>-0.21 (-17.3%)</b> | <b>0.03 (2.2%)</b>    | <b>0.56 (56.2%)</b>   | <b>0.01 (0.7%)</b>    | <b>-0.03 (-2.5%)</b>                 |
|                                                                            | Distance                          | 0.005                       | 0.248                 | 0.008                 | 0.322                 | 0.012                 | 0.026                                |



- <sup>a</sup> Patients with a history of cerebrovascular disease, myocardial infarction, or arrhythmias.
- <sup>b</sup> Mahalanobis distance between patients in the exposure and referent categories. In the decile analyses, the distance is measured within each decile and then averaged.
- <sup>c</sup> Difference between the observed odds ratio after adjusting by or matching on  $PS_{COH}$  versus  $PS_{SS}$ .

**Table S2c. Empirical results for the British Columbia APM study. Key within-PS interactions were omitted from PS models.**

| Model                                                                      |                                   | Entire Cohort<br>(n=42,565) | Males<br>(n=16,790)  | Females<br>(n=25,775) | Age <75<br>(n=11,899) | Age ≥75<br>(n=30,666) | High Risk<br>(n=6,519) <sup>a</sup> |
|----------------------------------------------------------------------------|-----------------------------------|-----------------------------|----------------------|-----------------------|-----------------------|-----------------------|-------------------------------------|
| Exposed outcomes                                                           | N                                 | 3883                        | 2052                 | 1831                  | 1190                  | 2693                  | 619                                 |
| Unexposed outcomes                                                         | N                                 | 3015                        | 1445                 | 1570                  | 430                   | 2585                  | 568                                 |
| <b>Unadjusted</b>                                                          | OR [CI]                           | 2.41 [2.29, 2.54]           | 2.31 [2.14, 2.50]    | 2.37 [2.21, 2.55]     | 4.37 [3.88, 4.91]     | 2.09 [1.97, 2.22]     | 1.79 [1.58, 2.03]                   |
| <b>Age/sex adjusted</b>                                                    | OR [CI]                           | 2.44 [2.32, 2.58]           | 2.41 [2.23, 2.60]    | 2.47 [2.29, 2.66]     | 4.44 [3.95, 5.00]     | 2.06 [1.94, 2.19]     | 1.84 [1.62, 2.09]                   |
| <b>Adjusted by all covariates</b>                                          | OR [CI]                           | 2.10 [1.97, 2.23]           | 1.96 [1.79, 2.16]    | 2.22 [2.04, 2.43]     | 2.83 [2.44, 3.27]     | 1.90 [1.77, 2.04]     | 1.60 [1.38, 1.86]                   |
| <b>PS estimated within subgroup (PS<sub>SS</sub>)</b>                      |                                   |                             |                      |                       |                       |                       |                                     |
| <b>"Referent Standard"</b>                                                 |                                   |                             |                      |                       |                       |                       |                                     |
| Adj. by deciles of PS <sub>SS</sub>                                        | OR [CI]                           | 1.93 [1.82, 2.05]           | 1.82 [1.66, 1.98]    | 2.05 [1.89, 2.23]     | 2.51 [2.20, 2.87]     | 1.80 [1.68, 1.92]     | 1.54 [1.33, 1.77]                   |
|                                                                            | Distance <sup>b</sup>             | 0.129                       | 0.176                | 0.143                 | 0.234                 | 0.114                 | 0.282                               |
| Matched on PS <sub>SS</sub>                                                | N Matched                         | 22,410                      | 9,104                | 13,268                | 6,546                 | 15,632                | 3,672                               |
|                                                                            | OR [CI]                           | 1.94 [1.81, 2.09]           | 1.72 [1.56, 1.90]    | 2.04 [1.85, 2.25]     | 2.46 [2.12, 2.87]     | 1.69 [1.56, 1.84]     | 1.55 [1.31, 1.83]                   |
|                                                                            | Distance                          | 0.003                       | 0.003                | 0.004                 | 0.004                 | 0.003                 | 0.008                               |
| <b>PS estimated overall (PS<sub>COH</sub>) and applied within subgroup</b> |                                   |                             |                      |                       |                       |                       |                                     |
| Adj. by deciles of PS <sub>COH</sub>                                       | OR [CI]                           | 1.93 [1.82, 2.05]           | 1.81 [1.66, 1.97]    | 2.06 [1.90, 2.24]     | 2.81 [2.47, 3.20]     | 1.76 [1.64, 1.88]     | 1.44 [1.25, 1.66]                   |
|                                                                            | <b>Difference (%)<sup>c</sup></b> | <b>0.00 (0.0%)</b>          | <b>-0.00 (-0.2%)</b> | <b>0.01 (0.3%)</b>    | <b>0.30 (12.0%)</b>   | <b>-0.03 (-1.9%)</b>  | <b>-0.10 (-6.6%)</b>                |
|                                                                            | Distance                          | 0.129                       | 0.175                | 0.153                 | 0.315                 | 0.145                 | 0.387                               |
| Matched on PS <sub>COH</sub>                                               | N Matched                         | 22,410                      | 9,128                | 13,286                | 6,694                 | 15,686                | 3,704                               |
|                                                                            | OR [CI]                           | 1.94 [1.81, 2.09]           | 1.73 [1.57, 1.92]    | 2.10 [1.90, 2.32]     | 2.71 [2.34, 3.14]     | 1.73 [1.60, 1.88]     | 1.39 [1.18, 1.64]                   |
|                                                                            | <b>Difference (%)</b>             | <b>0.00 (0.0%)</b>          | <b>0.01 (0.8%)</b>   | <b>0.06 (2.8%)</b>    | <b>0.25 (10.2%)</b>   | <b>0.04 (2.2%)</b>    | <b>-0.16 (-10.5%)</b>               |
|                                                                            | Distance                          | 0.003                       | 0.012                | 0.005                 | 0.082                 | 0.018                 | 0.081                               |
| <b>Matched pairs from PS<sub>COH</sub> matches</b>                         |                                   |                             |                      |                       |                       |                       |                                     |
| Matched on PS <sub>COH</sub>                                               | N Matched                         | 22,410                      | 4,318                | 8,286                 | 2,340                 | 11,582                | 640                                 |
|                                                                            | OR [CI]                           | 1.95 [1.81, 2.09]           | 1.82 [1.57, 2.11]    | 2.14 [1.88, 2.44]     | 3.28 [2.50, 4.30]     | 1.71 [1.56, 1.88]     | 1.06 [0.72, 1.58]                   |
|                                                                            | <b>Difference (%)</b>             | <b>0.00 (0.1%)</b>          | <b>0.10 (5.8%)</b>   | <b>0.10 (5.1%)</b>    | <b>0.82 (33.1%)</b>   | <b>0.02 (0.9%)</b>    | <b>-0.49 (-31.4%)</b>               |
|                                                                            | Distance                          | 0.003                       | 0.018                | 0.013                 | 0.093                 | 0.018                 | 0.188                               |

- <sup>a</sup> Patients with a history of cerebrovascular disease, myocardial infarction, or arrhythmias.
- <sup>b</sup> Mahalanobis distance between patients in the exposure and referent categories. In the decile analyses, the distance is measured within each decile and then averaged.
- <sup>c</sup> Difference between the observed odds ratio after adjusting by or matching on  $PS_{COH}$  versus  $PS_{SS}$ .

**Table S3. Simulation Results: Difference in the log of the treatment effect after adjusting by PS<sub>SS</sub> and PS<sub>COH</sub> versus true propensity.**

| Grouping of Simulation Runs                                 | Number of Runs | PS <sub>SS</sub> versus True Propensity <sup>a</sup>     |                                                         | PS <sub>COH</sub> versus True Propensity <sup>b</sup>    |                                                         |
|-------------------------------------------------------------|----------------|----------------------------------------------------------|---------------------------------------------------------|----------------------------------------------------------|---------------------------------------------------------|
|                                                             |                | Absolute Difference<br>(Median [Interquartile<br>Range]) | Percent Difference<br>(Median [Interquartile<br>Range]) | Absolute Difference<br>(Median [Interquartile<br>Range]) | Percent Difference<br>(Median [Interquartile<br>Range]) |
| <b>All simulation runs</b>                                  | 10,092,231     | 0.046 [0.021, 0.086]                                     | 3.9% [1.5%, 11.4%]                                      | 0.021 [0.010, 0.038]                                     | 1.7% [0.7%, 5.1%]                                       |
| <b>Baseline exposure prevalence (<math>\beta_0</math>)</b>  |                |                                                          |                                                         |                                                          |                                                         |
| $\beta_0 = 25\%$                                            | 5,050,241      | 0.047 [0.021, 0.088]                                     | 3.9% [1.5%, 11.6%]                                      | 0.022 [0.010, 0.040]                                     | 1.8% [0.7%, 5.3%]                                       |
| $\beta_0 = 50\%$                                            | 5,041,990      | 0.045 [0.021, 0.084]                                     | 3.8% [1.5%, 11.1%]                                      | 0.020 [0.009, 0.037]                                     | 1.7% [0.6%, 4.9%]                                       |
| <b>Baseline outcome event rate (<math>\gamma_0</math>)</b>  |                |                                                          |                                                         |                                                          |                                                         |
| $\gamma_0 = 0.01$ events per unit of person-time            | 2,486,731      | 0.050 [0.023, 0.095]                                     | 3.4% [1.2%, 9.8%]                                       | 0.023 [0.010, 0.042]                                     | 1.6% [0.6%, 4.4%]                                       |
| $\gamma_0 = 0.1$ events per unit of person-time             | 2,533,750      | 0.045 [0.021, 0.084]                                     | 4.1% [1.6%, 12.0%]                                      | 0.021 [0.009, 0.038]                                     | 1.8% [0.7%, 5.3%]                                       |
| $\gamma_0 = 0.25$ events per unit of person-time            | 2,493,000      | 0.045 [0.021, 0.083]                                     | 4.0% [1.6%, 12.1%]                                      | 0.020 [0.009, 0.037]                                     | 1.8% [0.7%, 5.3%]                                       |
| $\gamma_0 = 0.50$ events per unit of person-time            | 2,578,750      | 0.045 [0.020, 0.082]                                     | 4.0% [1.5%, 11.9%]                                      | 0.020 [0.009, 0.037]                                     | 1.8% [0.7%, 5.3%]                                       |
| <b>Within-PS interactions (<math>\beta_{PS-INT}</math>)</b> |                |                                                          |                                                         |                                                          |                                                         |
| $\beta_{PS-INT} = \log(1.0)$ (No interaction)               | 1,669,748      | 0.047 [0.021, 0.086]                                     | 3.8% [1.5%, 10.9%]                                      | 0.021 [0.010, 0.038]                                     | 1.7% [0.7%, 4.9%]                                       |
| $\beta_{PS-INT} = \log(3.0)$                                | 1,682,247      | 0.046 [0.021, 0.085]                                     | 3.8% [1.5%, 11.0%]                                      | 0.021 [0.010, 0.039]                                     | 1.7% [0.7%, 5.0%]                                       |
| $\beta_{PS-INT} = \log(3.5)$                                | 1,705,495      | 0.046 [0.021, 0.085]                                     | 3.9% [1.5%, 11.4%]                                      | 0.021 [0.010, 0.038]                                     | 1.8% [0.7%, 5.1%]                                       |
| $\beta_{PS-INT} = \log(4.0)$                                | 1,673,249      | 0.047 [0.021, 0.087]                                     | 3.9% [1.5%, 11.6%]                                      | 0.021 [0.010, 0.039]                                     | 1.8% [0.7%, 5.2%]                                       |
| $\beta_{PS-INT} = \log(4.5)$                                | 1,670,245      | 0.046 [0.021, 0.085]                                     | 3.9% [1.5%, 11.6%]                                      | 0.021 [0.010, 0.038]                                     | 1.8% [0.7%, 5.1%]                                       |
| $\beta_{PS-INT} = \log(5.0)$                                | 1,691,247      | 0.046 [0.021, 0.086]                                     | 3.9% [1.5%, 11.6%]                                      | 0.021 [0.010, 0.038]                                     | 1.8% [0.7%, 5.2%]                                       |
| <b>Treatment interactions (<math>\beta_{INT}</math>)</b>    |                |                                                          |                                                         |                                                          |                                                         |
| $\beta_{INT} = \log(1.0)$ (No interaction)                  | 1,679,739      | 0.048 [0.022, 0.090]                                     | 5.1% [2.0%, 12.8%]                                      | 0.022 [0.010, 0.040]                                     | 2.3% [0.9%, 5.6%]                                       |
| $\beta_{INT} = \log(3.0)$                                   | 1,687,495      | 0.046 [0.021, 0.085]                                     | 4.1% [1.6%, 12.0%]                                      | 0.021 [0.010, 0.038]                                     | 1.9% [0.7%, 5.4%]                                       |
| $\beta_{INT} = \log(3.5)$                                   | 1,685,249      | 0.046 [0.021, 0.085]                                     | 3.8% [1.5%, 11.4%]                                      | 0.021 [0.010, 0.038]                                     | 1.7% [0.7%, 5.1%]                                       |
| $\beta_{INT} = \log(4.0)$                                   | 1,670,248      | 0.046 [0.021, 0.085]                                     | 3.7% [1.4%, 11.6%]                                      | 0.021 [0.010, 0.038]                                     | 1.7% [0.6%, 5.2%]                                       |
| $\beta_{INT} = \log(4.5)$                                   | 1,704,500      | 0.046 [0.021, 0.084]                                     | 3.5% [1.3%, 10.7%]                                      | 0.021 [0.009, 0.038]                                     | 1.6% [0.6%, 4.8%]                                       |
| $\beta_{INT} = \log(5.0)$                                   | 1,665,000      | 0.046 [0.021, 0.084]                                     | 3.2% [1.2%, 9.4%]                                       | 0.021 [0.009, 0.038]                                     | 1.4% [0.6%, 4.2%]                                       |
| <b>Treatment effect (<math>\beta_x</math>)</b>              |                |                                                          |                                                         |                                                          |                                                         |
| $\beta_x = \log(1.0)$ (No effect)                           | 1,991,749      | 0.046 [0.021, 0.085]                                     | 4.1% [1.7%, 9.0%]                                       | 0.021 [0.010, 0.038]                                     | 1.9% [0.8%, 4.0%]                                       |
| $\beta_x = \log(2.0)$                                       | 2,035,996      | 0.046 [0.021, 0.085]                                     | 4.0% [1.6%, 9.1%]                                       | 0.021 [0.010, 0.038]                                     | 1.8% [0.7%, 4.1%]                                       |

|                       |           |                      |                    |                      |                   |
|-----------------------|-----------|----------------------|--------------------|----------------------|-------------------|
| $\beta_x = \log(3.0)$ | 2,040,746 | 0.046 [0.021, 0.086] | 4.1% [1.5%, 13.3%] | 0.021 [0.010, 0.038] | 1.8% [0.7%, 6.0%] |
| $\beta_x = \log(4.0)$ | 2,025,247 | 0.046 [0.021, 0.086] | 3.8% [1.4%, 16.9%] | 0.021 [0.010, 0.038] | 1.7% [0.6%, 7.4%] |
| $\beta_x = \log(5.0)$ | 1,998,493 | 0.047 [0.021, 0.086] | 3.4% [1.2%, 13.5%] | 0.021 [0.010, 0.039] | 1.5% [0.6%, 6.0%] |

#### Confounder-to-exposure association ( $\beta_{C1}$ )

|                          |           |                      |                    |                      |                   |
|--------------------------|-----------|----------------------|--------------------|----------------------|-------------------|
| $\beta_{C1} = \log(1.5)$ | 1,651,744 | 0.044 [0.020, 0.081] | 3.7% [1.4%, 11.1%] | 0.020 [0.009, 0.037] | 1.7% [0.7%, 5.0%] |
| $\beta_{C1} = \log(2.0)$ | 1,679,998 | 0.045 [0.020, 0.083] | 3.7% [1.4%, 10.6%] | 0.021 [0.009, 0.038] | 1.7% [0.7%, 4.9%] |
| $\beta_{C1} = \log(2.5)$ | 1,696,996 | 0.046 [0.021, 0.085] | 3.9% [1.5%, 11.5%] | 0.021 [0.010, 0.038] | 1.8% [0.7%, 5.1%] |
| $\beta_{C1} = \log(3.0)$ | 1,672,995 | 0.047 [0.021, 0.087] | 3.9% [1.5%, 11.5%] | 0.021 [0.010, 0.039] | 1.7% [0.7%, 5.1%] |
| $\beta_{C1} = \log(3.5)$ | 1,687,998 | 0.048 [0.022, 0.088] | 4.0% [1.5%, 11.8%] | 0.022 [0.010, 0.039] | 1.8% [0.7%, 5.3%] |
| $\beta_{C1} = \log(4.0)$ | 1,702,500 | 0.049 [0.022, 0.091] | 4.0% [1.5%, 11.7%] | 0.021 [0.010, 0.040] | 1.8% [0.7%, 5.1%] |

#### Confounder-to-outcome association ( $\gamma_{C1}$ )

|                           |           |                      |                    |                      |                   |
|---------------------------|-----------|----------------------|--------------------|----------------------|-------------------|
| $\gamma_{C1} = \log(1.5)$ | 1,681,999 | 0.046 [0.021, 0.086] | 4.0% [1.5%, 11.7%] | 0.021 [0.010, 0.038] | 1.8% [0.7%, 5.2%] |
| $\gamma_{C1} = \log(2.0)$ | 1,700,750 | 0.046 [0.021, 0.085] | 3.8% [1.5%, 11.2%] | 0.021 [0.010, 0.038] | 1.7% [0.7%, 5.0%] |
| $\gamma_{C1} = \log(2.5)$ | 1,683,748 | 0.046 [0.021, 0.085] | 3.8% [1.5%, 11.0%] | 0.021 [0.010, 0.038] | 1.7% [0.7%, 4.9%] |
| $\gamma_{C1} = \log(3.0)$ | 1,658,998 | 0.047 [0.021, 0.086] | 3.9% [1.5%, 11.4%] | 0.021 [0.010, 0.039] | 1.8% [0.7%, 5.1%] |
| $\gamma_{C1} = \log(3.5)$ | 1,671,245 | 0.047 [0.021, 0.086] | 3.9% [1.4%, 11.4%] | 0.021 [0.010, 0.039] | 1.7% [0.7%, 5.1%] |
| $\gamma_{C1} = \log(4.0)$ | 1,695,491 | 0.046 [0.021, 0.086] | 3.9% [1.5%, 11.4%] | 0.021 [0.010, 0.038] | 1.7% [0.7%, 5.1%] |

#### Expected n in $C_1$ subgroup ( $P_{C1}$ )

|                               |           |                      |                    |                      |                   |
|-------------------------------|-----------|----------------------|--------------------|----------------------|-------------------|
| Expected n in subgroup = 500  | 2,011,249 | 0.079 [0.036, 0.143] | 6.1% [2.3%, 17.3%] | 0.027 [0.012, 0.051] | 2.1% [0.8%, 6.1%] |
| Expected n in subgroup = 1000 | 2,027,982 | 0.054 [0.025, 0.097] | 4.3% [1.7%, 12.2%] | 0.022 [0.010, 0.040] | 1.8% [0.7%, 5.1%] |
| Expected n in subgroup = 1500 | 2,039,250 | 0.044 [0.020, 0.078] | 3.7% [1.4%, 10.3%] | 0.020 [0.009, 0.037] | 1.7% [0.7%, 4.9%] |
| Expected n in subgroup = 2000 | 2,003,500 | 0.038 [0.017, 0.067] | 3.2% [1.2%, 9.1%]  | 0.019 [0.009, 0.035] | 1.6% [0.6%, 4.7%] |
| Expected n in subgroup = 2500 | 2,010,250 | 0.034 [0.016, 0.059] | 2.8% [1.1%, 8.3%]  | 0.018 [0.009, 0.033] | 1.6% [0.6%, 4.6%] |

#### Actual n in $C_1$ subgroup

|                                         |           |                      |                    |                      |                   |
|-----------------------------------------|-----------|----------------------|--------------------|----------------------|-------------------|
| Actual n in subgroup $\leq 500$         | 1,029,345 | 0.081 [0.037, 0.146] | 6.2% [2.3%, 17.6%] | 0.027 [0.012, 0.051] | 2.1% [0.8%, 6.2%] |
| 500 < Actual n in subgroup $\leq 1000$  | 2,013,071 | 0.065 [0.030, 0.118] | 5.1% [1.9%, 14.6%] | 0.024 [0.011, 0.045] | 1.9% [0.7%, 5.6%] |
| 1000 < Actual n in subgroup $\leq 1500$ | 2,030,107 | 0.049 [0.022, 0.087] | 4.0% [1.5%, 11.2%] | 0.021 [0.010, 0.038] | 1.7% [0.7%, 5.0%] |
| 1500 < Actual n in subgroup $\leq 2000$ | 2,020,338 | 0.041 [0.019, 0.072] | 3.4% [1.3%, 9.7%]  | 0.020 [0.009, 0.036] | 1.7% [0.6%, 4.8%] |
| 2000 < Actual n in subgroup $\leq 2500$ | 2,004,923 | 0.036 [0.016, 0.063] | 3.0% [1.2%, 8.7%]  | 0.019 [0.009, 0.034] | 1.6% [0.6%, 4.6%] |
| Actual n in subgroup > 2500             | 994,447   | 0.033 [0.015, 0.059] | 2.8% [1.1%, 8.2%]  | 0.018 [0.009, 0.033] | 1.6% [0.6%, 4.5%] |

#### Number of exposed outcomes in full cohort (a)

|                    |           |                      |                    |                      |                   |
|--------------------|-----------|----------------------|--------------------|----------------------|-------------------|
| $a \leq 200$       | 2,308,579 | 0.052 [0.023, 0.098] | 5.9% [1.9%, 17.8%] | 0.023 [0.010, 0.043] | 2.6% [0.8%, 7.9%] |
| 200 < $a \leq 400$ | 1,226,072 | 0.047 [0.021, 0.087] | 5.7% [1.9%, 18.7%] | 0.021 [0.010, 0.038] | 2.5% [0.9%, 8.2%] |
| 400 < $a \leq 750$ | 1,500,218 | 0.046 [0.021, 0.085] | 5.8% [2.1%, 18.5%] | 0.021 [0.010, 0.038] | 2.6% [0.9%, 8.2%] |
| $a > 750$          | 5,057,362 | 0.044 [0.020, 0.081] | 2.8% [1.2%, 6.7%]  | 0.020 [0.009, 0.037] | 1.3% [0.5%, 3.1%] |

**Number of exposed outcomes in C<sub>1</sub> subgroup (a<sub>C<sub>1</sub>=1</sub>)**

|                                        |           |                      |                    |                      |                   |
|----------------------------------------|-----------|----------------------|--------------------|----------------------|-------------------|
| a <sub>C<sub>1</sub>=1</sub> ≤ 10      | 1,001,185 | 0.069 [0.030, 0.135] | 6.4% [1.9%, 19.0%] | 0.028 [0.012, 0.054] | 2.6% [0.7%, 7.8%] |
| 10 < a <sub>C<sub>1</sub>=1</sub> ≤ 25 | 795,308   | 0.054 [0.025, 0.101] | 6.7% [2.4%, 19.3%] | 0.023 [0.010, 0.042] | 2.8% [1.0%, 8.1%] |
| 25 < a <sub>C<sub>1</sub>=1</sub> ≤ 50 | 917,105   | 0.052 [0.023, 0.096] | 6.2% [2.2%, 18.2%] | 0.022 [0.010, 0.041] | 2.6% [0.9%, 7.9%] |
| a <sub>C<sub>1</sub>=1</sub> > 50      | 7,378,633 | 0.043 [0.020, 0.078] | 3.3% [1.3%, 9.0%]  | 0.020 [0.009, 0.036] | 1.5% [0.6%, 4.1%] |

---

a Difference in the log of the observed rate ratio between models adjusted by PS<sub>SS</sub> versus those adjusted by the known-true propensity.

b Difference in the log of the observed rate ratio between models adjusted by PS<sub>COH</sub> versus those adjusted by the known-true propensity.
